1 **Diversity Predicts Ability of Bacterial Consortia to Mitigate a Lethal Wildlife Pathogen**

2 Rachael E. Antwis<sup>1,2\*</sup> #, Xavier A. Harrison<sup>3</sup> #

3

4 1. School of Environment and Life Sciences, University of Salford, Salford, UK

5 2. Unit for Environmental Sciences and Management, North-West University, Potchefstroom, South  
6 Africa

7 3. Institute of Zoology, Zoological Society of London, Regent's Park, London NW1 4RY

8

9 **# Both authors contributed equally to this paper**

10

11 **Address for Correspondence:**

12 Dr. Rachael Antwis, University of Salford, Room 336, Peel Building, The Crescent, Salford, M5 4WT,  
13 UK

14 01612954641

15 [r.e.antwis@salford.ac.uk](mailto:r.e.antwis@salford.ac.uk)

16

17 **Running Title:**

18 Bacterial diversity alters pathogen growth

19

20 **Conflict of Interest:**

21 The authors declare no conflict of interest.

22

23

24

25 **ABSTRACT**

26 Symbiotic bacterial communities can protect their hosts from infection by pathogens. Treatment of wild  
27 individuals with protective bacteria isolated from hosts can combat the spread of emerging infectious  
28 diseases, but it is unclear whether the degree of bacterially-mediated host protection is uniform across  
29 multiple isolates of globally-distributed pathogens. Here we use the lethal amphibian fungal pathogen  
30 *Batrachochytrium dendrobatidis* as a model to investigate the traits predicting broad-scale *in vitro*  
31 inhibitory capabilities of both individual bacteria and multiple-bacterial consortia. We show that  
32 inhibition of multiple pathogen isolates is rare, with no clear phylogenetic signal at the genus level.  
33 Bacterial consortia offer stronger protection against *B. dendrobatidis* compared to single isolates, but  
34 critically this was only true for consortia containing multiple genera, and this pattern was not uniform  
35 across all *B. dendrobatidis* isolates. These novel insights have important implications for the effective  
36 design of bacterial probiotics to mitigate emerging infectious diseases.

37

## 38 INTRODUCTION

39 The last 50 years have seen the emergence of several virulent wildlife pathogens with broad host  
40 ranges (Tompkins et al 2015). These emerging infectious disease (EIDs) have decimated wildlife  
41 populations globally, and are a major contributor to the current global loss of biodiversity (e.g. Skerratt  
42 et al 2007; McCallum 2012). Both climate change (Cohen et al 2017) and the global trade in animals  
43 (Tompkins et al 2015) are exacerbating the spread of EIDs, and broad-scale, effective treatments  
44 and/or prophylaxis for these pathogens in the wild are often lacking (Sleeman 2013; Garner et al  
45 2016). Developing such treatments is often complicated by broad variation in genetic and phenotypic  
46 traits such as virulence exhibited by these pathogens (e.g. de Jong & Hien 2006; Schock et al 2010;  
47 Farrer et al 2011). Successful mitigation of EIDs in the wild demands that preventative or curative  
48 therapies demonstrate broad activity over as many genetic variants of the pathogen as possible, and  
49 developing mitigation strategies that satisfy this criterion remains a major outstanding research goal.

50 Most EIDs are attributed to fungal pathogens, including *Pseudogymnoascus destructans* that causes  
51 white nose syndrome in bats, and *Batrachochytrium spp.*, which causes chytridiomycosis in  
52 amphibians (Fisher et al 2012). *Batrachochytrium dendrobatidis* comprises multiple, deeply diverged  
53 lineages, and is capable of rapid evolution (Farrer et al 2011; 2013). Endemic hypovirulent lineages of  
54 *B. dendrobatidis* have been identified, including *BdCAPE* (South Africa), *BdCH* (Switzerland), *BdBrazil*  
55 (Brazil) and a lineage from Japan (Goka et al 2009; Farrer et al 2011; Schloegel et al 2012;  
56 Rosenblum et al 2013; Rodriguez et al 2014), although there are cases where these have spread to  
57 other regions and are implicated in population declines in those regions (e.g. *BdCAPE* in Mallorcan  
58 midwife toads, *Alytes muletensis*; Doddington et al 2013). The globally distributed and hypervirulent  
59 global panzootic lineage (*BdGPL*) is the genetic lineage of *B. dendrobatidis* associated with  
60 phenomenal mass mortalities and rapid population declines of amphibians around the world, and is a  
61 major driver of the current “amphibian extinction crisis” (Fisher et al 2009; Farrer et al 2011; Olson et  
62 al 2012). Isolates within this lineage exhibit enormous and unpredictable variation in virulence, even  
63 within a single host species exposed under laboratory conditions (Farrer et al 2011; Farrer et al 2013).

64 There is currently no cure for this disease in the wild (reviewed in Garner et al 2016), and given that  
65 amphibian communities may be host to multiple *BdGPL* genotypes (Morgan et al 2007; Rodriguez et  
66 al 2014), and that continuous global movement of humans and wildlife transports the fungus, any

67 prophylactic or curative treatment needs to be effective against multiple *B. dendrobatidis* genotypes and  
68 isolates.

69 Bacterial probiotics represent a promising tool to combat major emerging fungal pathogens in the wild,  
70 including *Pseudogymnoascus destructans* (Hoyt et al 2015), *B. dendrobatidis*, and the closely related  
71 *B. salamandrivorans* (Martel et al 2013; 2014). Of these, probiotic research is currently most advanced  
72 for *B. dendrobatidis* (reviewed in Bletz et al 2013 and Rebollar et al 2016). Laboratory and field studies  
73 have shown host-associated bacterial communities (hereafter referred to as the 'microbiome') protect  
74 amphibians from *B. dendrobatidis* infection, and that it is possible to artificially augment the  
75 microbiome with 'probiotic' bacteria to improve survivorship in response to the pathogen (Bletz et al  
76 2013; Becker et al 2015; Walke et al 2015).

77 To date, most *in vitro* *Bd*GPL challenge experiments have tested the ability of candidate probiotics to  
78 limit the growth of a single isolate of *Bd*GPL. This is problematic because the inhibitory capabilities of  
79 individual bacteria are not uniform across the variation presented by *Bd*GPL (Antwis et al 2015).

80 Previous work has found no evidence of a phylogenetic signal in the ability of bacterial genera to  
81 inhibit a singular *Bd*GPL isolate (Becker et al 2015), but a major gap in our understanding concerns  
82 whether some bacterial genera are more likely to show broad-spectrum inhibition across a range of  
83 *Bd*GPLs, allowing a more focussed search for effective amphibian probiotics. Furthermore, both *in*  
84 *vivo* amphibian probiotic trials and *in vitro* challenges focus on the application of a singular bacterial  
85 isolate to arrest the growth of *B. dendrobatidis*, yet the importance of a complex and diverse  
86 microbiome for resilience to infection has been repeatedly demonstrated across a range of host taxa  
87 (e.g. Dillon et al 2005; Matos et al 2005; Van Elsas et al 2012; Eisenhauer et al 2013). A novel  
88 alternative strategy involves a 'bacterial consortium' approach to probiotics, whereby multiple inhibitory  
89 bacterial isolates are applied simultaneously. Multi-species consortia can increase the inhibition of  
90 *Bd*GPL (Piova-Scott et al 2017), and so may offer greater inhibitory capabilities across a wider range  
91 of *B. dendrobatidis* isolates, however the generality of this pattern across multiple pathogen variants  
92 remains untested. Addressing the shortfall in our understanding is critical for developing effective tools  
93 for the mitigation of EIDs in the wild.

94 Here we extend previous work to quantify the ability of metabolites from both individual bacteria and  
95 co-cultured bacterial consortia to demonstrate broad-scale inhibition across a panel of *B.*

96 *dendrobatidis* isolates. First, we test 58 bacterial isolates from 10 genera for inhibition against a suite

97 of 10 different *BdGPL* isolates to quantify; i) variation among bacterial genera in ability to demonstrate  
98 broad-spectrum *BdGPL* inhibition; and ii) variation among *BdGPL* isolates in susceptibility to inhibition.  
99 Second, we quantify the relative efficacy of using single bacterial isolates or bacterial consortia to  
100 modify *B. dendrobatidis* growth rates *in vitro*. Specifically, we investigate; iii) whether consortia yield  
101 stronger inhibition than single bacteria across three *B. dendrobatidis* isolates from two lineages  
102 (*BdGPL* and *BdCAPE*); and iv) whether the diversity of a bacterial consortium (number of member  
103 genera) affects inhibitory capabilities.

104

## 105 **METHODS**

### 106 *Phylogeny screening*

107 *In vitro* challenges were conducted for 58 bacteria isolated from wild *Agalychnis spp.* frogs in Belize  
108 (Antwis et al 2015) to screen for inhibitory capabilities against 10 *BdGPL* isolates (Table 1, Figure 1).  
109 Bacteria belonged to 10 genera, with 3-11 bacterial isolates per genus (Table S1). Bacteria were  
110 previously identified (Antwis et al 2015) using colony PCR with primer pair 27F and 1492R for the 16S  
111 rRNA gene, which were sequenced at the University of Manchester, and then the forward and reverse  
112 sequences were aligned for each bacterium and blasted against the NCBI database  
113 (<http://blast.ncbi.nlm.nih.gov/Blast.cgi>). Inhibition challenges were conducted using an *in vitro*  
114 spectrophotometer assay method adapted from Bell et al. (2013), Woodhams et al (2014) and Becker  
115 et al (2015). Bacteria were grown by adding 50ul of frozen stock bacteria (stored in 30% glycerol, 70%  
116 tryptone solution at -80°C) to 15ml of 1% tryptone, and incubating at 18°C for 36 hours until turbid  
117 (three cultures per bacterial isolate). Although cell density has been shown to influence metabolite  
118 production in culture (Yasumiba et al 2015), we decided not to count and adjust cell density prior to  
119 inhibition trials as subsequent addition of media may alter the metabolite profiles already produced by  
120 cultures. In addition, cultures were not grown in the presence of *B. dendrobatidis* as multiple *B.*  
121 *dendrobatidis* isolates were tested in this study and this would have confounded results.

122 Turbid cultures were filtered through a 0.22um sterile filter (Millipore, Ireland) to remove live cells,  
123 leaving only bacterial metabolites in solution. These were then combined across the three cultures for  
124 a given bacterial isolate, and kept on ice until *B. dendrobatidis* challenges were conducted. *BdGPL*  
125 (Table 1) isolates were grown in 1% tryptone broth until maximum zoospore production was observed

126 (~3-4 days;  $\sim 1 \times 10^6$  zoospores  $\text{ml}^{-1}$ ). As with bacteria, three flasks per *B. dendrobatidis* isolate were  
127 grown and then combined prior to challenges to limit flask-effect. Zoospores were separated from  
128 sporangia by filtering through 20um sterile filters (Millipore, Ireland). To conduct the  
129 spectrophotometer assays, 50ul of bacterial metabolites and 50ul of *B. dendrobatidis* suspension were  
130 pipetted into 96-well plates. Each *B. dendrobatidis*-bacteria combination was run with three repeats.  
131 Positive controls were included using 50ul 1% tryptone instead of bacterial metabolites. Negative  
132 controls were included using 50ul sterile water and 50ul of heat-treated *B. dendrobatidis* for each  
133 isolate. Plate readings were taken every 24 hours for four days using a 492nm filter.  
134 For each measurement, data were transformed using the equation  $\text{Ln}(\text{OD}/(1-\text{OD}))$ , and a regression  
135 analysis was used to gain the slope values for each sample over time. Slopes of triplicate replicates  
136 for each Bd/Bacteria combination were averaged, and total *B. dendrobatidis* inhibition was calculated  
137 using the formula: Inhibition (%) =  $[1-(\text{slope of sample}/\text{slope of control})] \times 100$ . A positive value  
138 represents inhibition of *B. dendrobatidis* growth, and a negative value indicates enhanced growth of *B.*  
139 *dendrobatidis*.

140

#### 141 *Bacterial consortium challenges*

142 Three bacteria were then selected from each of four genera (*Acinetobacteria*, *Chryseobacterium*,  
143 *Serratia*, *Stenotrophomonas*) based on their inhibition profiles; poor to medium inhibitors were  
144 selected to determine whether combining these bacteria would improve their inhibitory capabilities.  
145 Bacteria were grown individually until turbid and added to fresh tryptone either individually (strains A,  
146 B and C of each genus separately), or as a triple (strains A, B and C of each genus together to form  
147 single-genus mixes, or a random combination of strains across genera to form multi-genus consortia  
148 (Table 2)). For both individual and triple bacterial combinations, a total of 3ml of bacteria were added  
149 to 12ml of fresh 1% tryptone broth and left to grow together for 12 hours. The volume of each  
150 bacterium added depended on whether the consortium contained one or three bacteria, and the  
151 volume was split evenly between the number of bacteria added to each group. Following this,  
152 bacteria-*B. dendrobatidis* challenges were conducted using the same methods as described above  
153 against three *B. dendrobatidis* isolates (Table 1). Average inhibition percentages for each consortium-  
154 *B. dendrobatidis* combination were calculated as described above.

155

156 *Statistical Analysis*

157 All statistical analyses were conducted in the software R v.3.3.2 (R Core Team 2016; Supplementary  
158 Information).

159

160 *Phylogeny Data:* To quantify differences among genera in proportion of *BdGPL* isolates inhibited  
161 (inhibition score >0), we fitted a Binomial GLM with the proportion of the 10 *BdGPL* isolates each  
162 bacterial isolate inhibited as the response, and genus as a fixed effect. We used the quasibinomial  
163 error structure as the model was overdispersed (dispersion 6.4), and tested the model containing a  
164 genus term with the reduced intercept-only model using a likelihood ratio test.

165 To quantify differences among genera in the *degree* of inhibition (size of inhibition score), we fitted a  
166 hierarchical model in the R package *MCMCglmm* (Hadfield 2010) with the individual inhibition scores  
167 of each bacterial isolate (n=58) for each *BdGPL* isolate (n=10; total n = 580) as a Gaussian response.  
168 We fitted both *BdGPL* isolate, and bacterial strain ID nested within bacterial genus as random effects.  
169 We use uninformative, parameter-expanded priors for the random effects as detailed in Hadfield  
170 (2010). We ran models for a total of 100,000 iterations following a burn-in of 10,000 iterations and  
171 using a thinning interval of 50. Posterior model checks indicated no significant autocorrelation within  
172 chains (all values < 0.05) and adequate convergence using the Geweke diagnostic (Geweke 1992).  
173 Inspection of model residuals from the frequentist analogue of this model fitted in *lme4* (Bates et al  
174 2015) revealed normally-distributed residuals and no evidence of heteroscedasticity. Rerunning  
175 models with stronger priors has no effect on model results.

176 To calculate % variance in inhibition explained by *BdGPL* isolate, bacterial genus, and bacterial strain  
177 respectively, we extracted the variance components from the variance-covariance matrix of the model  
178 above. We expressed the variance of a component  $V$  as a percentage of the total variance calculated  
179 as  $(V_{BdGPL} + V_{genus} + V_{strain} + V_{residual})$ . We calculated both mean and 95% credible intervals using the  
180 posterior samples from the model. To construct Figs. 1 and 2, we extracted the marginal means and  
181 95% credible intervals for each bacterial strain and *BdGPL* isolate, respectively. That is, the bacterial  
182 strain modes are marginalised with respect to *BdGPL* and vice versa, to quantify whether the *average*  
183 scores for each *BdGPL* or bacterial isolate are significantly different from zero.

184 *Consortium Data*: To calculate the relative mean inhibition of single-genus (SG) vs multi-genus (MG)  
185 consortia, we fitted a mixed model in *MCMCglmm* with inhibition as a Gaussian response, consortium  
186 type as a 2-level factor, and a random effect of *B. dendrobatidis* and using uninformative priors. To  
187 calculate whether consortia exhibited stronger inhibition than the mean of their individual isolates, we  
188 constructed a binary variable with outcome 1 if a consortium's inhibition was greater than the single  
189 isolate mean and 0 if equal to or lower. We fitted this as a response in a binary GLMM with consortium  
190 type as a fixed effect, *B. dendrobatidis* as a random effect and using uninformative priors. Neither  
191 model exhibited signs of autocorrelation and Geweke statistics for both models indicated  
192 convergence.

193 *In silico Probiotic Consortium Trials*: To probe the relative effectiveness of single bacteria, SG  
194 consortia and MG consortia (hereafter 'probiotic types') for modifying the growth rates of *B.*  
195 *dendrobatidis*, we ran three sets of simulations, each comprising 1000 iterations. For each set of  
196 simulations, we calculated i) the proportion of times a MG consortium yielded higher inhibition than a  
197 SG consortium; ii) the proportion of times a MG consortium yielded higher inhibition than a single  
198 bacterial isolate; iii) the probability that a MG, SG or single bacterial isolate would yield at least 50%  
199 inhibition, which we class as strong inhibition. Adopting a Monte Carlo Integration approach allows us  
200 to investigate the performance of different probiotic strategies for individual *Bd* isolates. Calculating  
201 group means of each probiotic type does not allow one to calculate the frequency that one probiotic  
202 type might outperform another, as this approach does not explicitly make pairwise comparisons and in  
203 fact loses information by comparing group means. Group means can be skewed by large individual  
204 values, and therefore be misleading with respect to the efficacy of a particular strategy if the mean of  
205 that group is not reflective of the true variance in the data. However we report group means alongside  
206 these statistics where appropriate for comparison. We derived 95% confidence intervals for each test  
207 statistic by performing 10,000 bootstrap samples with replacement from the test distributions. The  
208 three simulations were as follows:

209 (1) Averaged over all *B. dendrobatidis* isolates: For each iteration, we randomly selected a *B.*  
210 *dendrobatidis* isolate, and then randomly selected both a SG and a MG consortium. A Single bacterial  
211 isolate score was then selected randomly from one of the members of the MG consortium.



212 (2) *B. dendrobatidis* specific scores: To investigate the potential for the effectiveness of consortia to  
213 differ depending on *B. dendrobatidis* isolate, we repeated the simulations as in (1) but performed 1000  
214 simulations for each *B. dendrobatidis* isolate.

215 (3) Sequential *B. dendrobatidis* exposure: Finally, we examined the ability of the three probiotic types  
216 to inhibit two *B. dendrobatidis* isolates encountered in series by randomly selecting two of the three *B.*  
217 *dendrobatidis* isolates. We assumed that the two isolates are not encountered simultaneously, as co-  
218 occurrence of two *Bd* isolates may modify their growth rates and/or a bacterial isolate's ability to inhibit  
219 them. For each iteration, we selected a random MG and SG consortium, followed by a randomly-  
220 selected single isolate member from the MG consortium. Individual inhibition scores for these three  
221 groups were then extracted for both selected *B. dendrobatidis* isolates (i.e. probiotic ID was kept  
222 consistent over both pathogen isolates). We calculated the probability that the MG consortium would  
223 yield superior inhibition to the SG consortium and single bacterial isolate across both *B. dendrobatidis*  
224 isolates, and the probability that all three probiotic types would yield >50% inhibition.

225  
226

## 227 **RESULTS**

### 228 **Phylogenetic Signals of *Bd*GPL Inhibition**

229 We assayed the ability of 58 bacterial isolates from 10 genera to modify the growth rates of 10 *Bd*GPL  
230 isolates. Mean inhibition scores ranged from 100% (complete inhibition of growth) to -225% (strong  
231 facilitation of growth). At the genus level, there was no significant variation among genera in mean  
232 proportion of *Bd*GPL isolates inhibited (Binomial GLM;  $\chi^2_9 = 6.2$ ,  $p=0.72$ ; Table 3). Six isolates from  
233 five genera showed at least weak inhibition across all 10 *Bd*GPLs, whilst seven isolates from five  
234 genera facilitated the growth of all 10 isolates (Supplementary Table S1).

235 Variance component analysis revealed considerably more variation in inhibition scores among  
236 bacterial strains *within* genera than among genera themselves (Fig. 1). Variation among bacterial  
237 strains within genera explained 51% [95% credible interval (CRI) 37-63%] of the variation in *Bd*GPL  
238 inhibition scores compared to just 1.3% [0.09-6%] for bacterial genus. *Bd*GPL isolate explained 15.6%  
239 [4.8-30%] of the variation in inhibition scores and highlighted two isolates whose marginal effect sizes  
240 were significantly negative (JEL423 and AUL2), and one isolate with a significantly positive  
241 marginalised inhibition score (08MG04; Fig. 2). JEL423 and AUL2 therefore exhibit strongly enhanced

242 growth in the presence of bacterial metabolites, whereas 08MG04 is particularly susceptible to  
243 inhibition of growth. The remaining seven *BdGPL* isolates demonstrated no evidence of systematic  
244 susceptibility to inhibition of their growth rates across the bacteria tested (Fig. 2).

245

## 246 **Multi-Isolate Consortia as Tools for Pathogen Mitigation**

247 Consortia containing isolates from Multi-Genus (MG) exhibited significantly higher mean inhibition  
248 scores compared to Single-Genus (SG) consortia when marginalising with respect to *B. dendrobatidis*  
249 isolate (MG consortia mean inhibition: 36.88%; SG consortia mean: 16.9%; 95% CRI of difference  
250 4.12 – 36.52%,  $p_{\text{MCMC}} = 0.02$ ; Fig. 3). If the ability of a consortium to inhibit *B. dendrobatidis* was  
251 simply an additive function of the inhibitory capabilities of the individual bacteria it comprised, we  
252 would expect the consortium's inhibition score to be equal to the mean of the individual inhibition  
253 scores, weighted by relative abundance. Inhibition scores of consortia greater than the mean of  
254 individual isolate scores are indicative of synergistic effects, whereby the combined pool of  
255 metabolites from multiple bacteria inhibits *B. dendrobatidis* more strongly than the individual isolates.  
256 MG consortia had a 61% probability of demonstrating stronger inhibition than the mean of their single  
257 composite bacterial isolates, which was significantly higher than the corresponding probability for SG  
258 isolates (26.6%, Mean difference 39.4% [95% Credible Interval 11.2-65.1%],  $p_{\text{MCMC}} = 0.01$ ).

259

## 260 ***in silico* Probiotic Consortia Trials**

261 Of the 1000 simulated probiotic trials, naïve application of a MG consortium yielded higher *B.*  
262 *dendrobatidis* inhibition in 69.4% of cases [95% CI 66.5-72.3%] compared to SG consortia (null  
263 expectation 50%,  $p_{\text{RAND}} < 0.001$ ). Moreover, MG consortia had a 38.1% [35.1 – 41.1%] probability of  
264 yielding inhibition greater than 50% (strong inhibition), compared to only 13.9% [11.8 – 16.1%]  
265 probability for SG consortia. Mean inhibition for all MG consortia was 36.7%, compared to 16.47% for  
266 SG consortia. MG consortia outperformed the single isolate in 61% [58-64%] of cases (null  
267 expectation 50%,  $p_{\text{RAND}} < 0.001$ ). However, by averaging over all *B. dendrobatidis* isolates, these  
268 results masked substantial variation among *B. dendrobatidis* isolates in the relative efficacy of MG  
269 versus SG consortia. We repeated the above simulations separately for each *B. dendrobatidis* isolate,  
270 and found that MG consortia were superior to SG consortia and single bacterial isolates for only two *B.*

271 *dendrobatidis* isolates (*Bd*GPL MODS28 and *Bd*CAPE TF5a1), and performed slightly worse than SG  
272 consortia for *Bd*GPL SFBC019 (Fig. 4A). Moreover, although MG consortia have the greatest  
273 probability of yielding >50% inhibition for *Bd*GPL MODS28 and *Bd*CAPE TF5a1, this was not the case  
274 for *Bd*GPL SFBC019, where SG consortia had a marginally higher probability of delivering strong  
275 inhibition (Fig. 4B).

276 Finally, we tested the ability of both MG and SG consortia to inhibit the growth of two different *B.*  
277 *dendrobatidis* isolates in series, as individuals in a single location may be exposed to multiple variants  
278 of a pathogen (Goka et al 2009; Schloegel et al 2012; Rodriguez et al 2014; Jenkinson et al 2016), or  
279 strong spatial structure of the pathogen and high host dispersal may expose individuals to multiple  
280 pathogen variants consecutively. For a given trial, the modelling outcomes were; i) MG consortia  
281 inhibited both *B. dendrobatidis* isolates more strongly than SG consortia; ii) SG consortia inhibited  
282 both *B. dendrobatidis* isolates more strongly than MG consortia; iii) MG inhibited the first *B.*  
283 *dendrobatidis* isolate more strongly than SG consortia, but not the second; iv) MG inhibited the second  
284 *B. dendrobatidis* isolate more strongly than SG consortia, but not the first. Applying the same MG  
285 consortium to two *B. dendrobatidis* isolates in series achieved stronger inhibition than SG consortia in  
286 49.4% [46.3 – 52.5%] of cases (i.e. modelling outcome i; null expectation 25% [0.5<sup>2</sup>],  $p_{\text{RAND}} < 0.001$ ).  
287 This compared to only 7.9% [6.4-9.6%] of cases where SG consortia exhibited superior inhibition for  
288 both *B. dendrobatidis* isolates (i.e. modelling outcome iv). Mean inhibition across both *Bd* isolates for  
289 the MG consortia was 73.4%, compared to 32.5% for SG consortia. MG consortia provided superior  
290 inhibition for only one of the *B. dendrobatidis* isolates in the remaining 43% of cases (mean 20.3% and  
291 22.4% of simulations with superior inhibition for the first and second isolate respectively). MG  
292 consortia exhibited strong inhibition (>50%) for both isolates in 14.7% [12.5-17%] of cases, compared  
293 to zero cases where SG isolates did so. Applying a single bacterial isolate instead of a SG or MG  
294 consortium resulted in strong inhibition for both *B. dendrobatidis* isolates in only 4% [2.9-5.3%] of  
295 cases (Fig. 4C).

296

## 297 **DISCUSSION**

298 The principal objectives of this study were two-fold: i) to determine the magnitude, if any, of  
299 phylogenetic signal in the ability of certain genera of bacteria to inhibit a broad range of *Bd*GPL

300 isolates; and ii) to examine the relative effectiveness of single bacteria and bacterial consortia to inhibit  
301 several isolates of *B. dendrobatidis*. We found no evidence of variation among bacterial genera in their  
302 ability to exhibit broad-range inhibition across multiple *BdGPL* isolates. Furthermore, our data  
303 suggested consortia provide superior *B. dendrobatidis* inhibition than individual bacteria, but critically  
304 this pattern is not uniform across pathogen isolates, and is contingent on consortium taxonomic  
305 diversity. Our results have important implications for our understanding of the factors determining *in*  
306 *vivo* resistance to infection in the wild, and provide novel insights into effective strategies for designing  
307 probiotic therapies to mitigate lethal cutaneous infections.

308

### 309 *Phylogenetic Signals of BdGPL Inhibition*

310 We detected no phylogenetic signal in the ability of individual bacterial genera to inhibit multiple  
311 *BdGPL* isolates. These data support previous work suggesting the ability to inhibit *B. dendrobatidis* is  
312 distributed widely over bacterial genera (Antwis et al 2015; Becker et al 2015); several isolates  
313 demonstrated at least weak inhibition for all 10 *BdGPL*s but were spread across multiple genera with  
314 no clear pattern. That there is clear functional redundancy among genera in this host-protective trait  
315 suggests it is not prudent to focus on any one genus in the search for beneficial probiotics (Becker et  
316 al 2015), as highly divergent microbial communities can still possess similar functional traits (e.g. Bletz  
317 et al 2016). The principal source of variance in inhibition was among bacterial strains, with the number  
318 of isolates demonstrating broad-spectrum *facilitation* of *BdGPL* being roughly equal to the number  
319 exhibiting broad-scale *inhibition* of the pathogen. The phenomenon of *BdGPL* growth facilitation has  
320 been described previously for single pathogen isolates (Bell et al 2013; Becker et al 2015), but  
321 crucially our results suggest that a bacterial strain's ability to facilitate the growth of *B. dendrobatidis*  
322 may extend across a broad suite of pathogen isolates.

323 It is unclear why some bacterial isolates facilitate *B. dendrobatidis* growth, but one likely explanation is  
324 that certain bacterial metabolites can act as growth substrates for fungi (Garbaye 1994; Hardoim et al  
325 2015), or that different bacterial metabolites alter the abiotic environment (e.g. pH) to confer different  
326 growth rates (Romanowski et al 2011). Here we have provided some of the first evidence that  
327 facilitation of *B. dendrobatidis* growth is not simply a rare phenomenon arising from specific  
328 *BdGPL*/bacterial combinations, but that this is widespread across bacterial isolates, and different

329 *BdGPL* isolates differ systematically in their growth rates when exposed to bacterial metabolites. That  
330 said, all four CORN isolates showed similar levels of inhibition across all bacterial isolates, whereas  
331 the two AUL isolates exhibited markedly different inhibition profiles (Figure 2). We identified one  
332 *BdGPL* isolate that was significantly prone to inhibition, and a further two isolates that demonstrated  
333 strong resistance to inhibition across the 58 bacterial isolates we tested. That there is variation in this  
334 trait among *BdGPL* isolates is intriguing; if facilitation occurs because *B. dendrobatidis* uses bacterial  
335 metabolites for nutrition, it may suggest some *B. dendrobatidis* variants can use those metabolites  
336 more efficiently for growth. Data gathered from additional isolates will allow us to formally test this  
337 hypothesis by probing whether a *BdGPL*'s susceptibility to inhibition or facilitation correlates with  
338 virulence. Previous work has shown no among-isolate variation in susceptibility of *B. dendrobatidis* to  
339 an echinocandin antifungal drug (Fisher et al 2009), yet our data suggest this pattern is not the same  
340 for bacterial metabolites. Recombination among lineages of *BdGPL* is common (Farrer et al 2011),  
341 providing a mechanism whereby metabolic genes favouring enhanced growth may be spread following  
342 contact among lineages. Our data have two important implications given the proclivity of *B.*  
343 *dendrobatidis* for recombination. First, among-isolate variation in susceptibility to inhibition suggests  
344 that the relative efficacy of probiotic or curative therapies in the wild will be modified by local *B.*  
345 *dendrobatidis* genotype. Second, though we tend to treat bacterial inhibition scores as fixed traits, this  
346 ignores the ability of genetic recombination among *B. dendrobatidis* lineages to modify the relationship  
347 between bacterial metabolites and pathogen growth rates. Even the application of probiotics  
348 themselves may represent a strong selective pressure favouring genetic variants of *B. dendrobatidis*  
349 that lack susceptibility to those probiotics. Although several trials have demonstrated the potential for  
350 probiotic prophylaxis against *B. dendrobatidis* (e.g. Harris 2009; Muletz et al 2012; Loudon et al. 2014;  
351 Kueneman et al 2016), we still lack the requisite data to measure selection caused by those trials on  
352 the pathogen. *In vitro* experimental evolution assays between pathogen and bacteria may prove the  
353 most powerful means for detecting such patterns.

354

### 355 *Consortium-Based Approaches to Combatting Fungal Pathogens*

356 Our results revealed a positive link between the taxonomic richness of a probiotic consortium and its  
357 ability to inhibit *B. dendrobatidis* growth, but crucially this relationship was highly dependent on *B.*  
358 *dendrobatidis* isolate. Multi-genus consortia outperformed both single-genus consortia and single

359 bacterial isolates in *B. dendrobatidis* inhibition, and were far more likely to produce strong inhibition of  
360 50% or greater, but only for two of the three pathogen variants.

361 The general relationship between inhibition and consortium diversity was in the expected direction; low  
362 community relatedness (i.e. high community dissimilarity) and high species richness both increase the  
363 resistance of a bacterial community to pathogenic ‘invaders’ (e.g. Jousset et al 2011; Eisenhauer et al  
364 2012, 2013). Furthermore, previous work has linked higher species diversity of probiotic consortia to  
365 increased *B. dendrobatidis* inhibition using a single pathogen isolate (Loudon et al 2014; Piova-Scott  
366 et al 2017). Superior inhibition from consortia, rather than single isolates, may arise as a by-product of  
367 the interference competition over resources created by co-culture (Scheuring & Yu 2012). Thus, even  
368 bacteria that are weak inhibitors when grown individually can increase the overall inhibitory power of a  
369 consortium by creating a competitive environment that favours greater production of anti-fungal  
370 compounds. Functional dissimilarity has been proposed as more important than taxonomic diversity in  
371 predicting a community’s resilience to invasion (Eisenhauer et al 2013), but may explain why single-  
372 genus consortia did not perform as well as multi-genus consortia. In selecting for genetic diversity, we  
373 may have been simultaneously selecting for functional diversity not present when co-culturing three  
374 members of the same genus.

375 That *B. dendrobatidis* isolate can alter the strength of the relationship between consortium diversity  
376 and inhibition is a highly novel finding. Our simulated probiotic trials revealed that for two *B.*  
377 *dendrobatidis* isolates, combining bacteria into multi-genus consortia yielded significantly better  
378 inhibition than applying one of the member bacteria in isolation. These results provide further support  
379 for a synergistic effect of co-culture on inhibition. If multi-genus consortia were no better at inhibition  
380 than the mean of their composite members, Monte Carlo integration over all single isolate scores  
381 would not have recovered a significant difference between the two groups. Yet, for *BdGPL* MODS28  
382 and *BdCAPE* TF5a1, multi-genus consortia yielded by far the highest probability of observing strong  
383 inhibition of 50% or more. That this pattern was not conserved for *BdGPL* SFBC019 is perhaps the  
384 most intriguing finding. As for *BdGPL* variants JEL423 and AUL2 in the phylogenetic trials, SFBC019  
385 was largely resistant to inhibition, with individual bacterial inhibition scores that were often negative.  
386 One possible explanation for the lack of efficacy of consortia against SFBC019 is that the when a  
387 variant of *B. dendrobatidis* is resistant to inhibition and/or there is little variation in inhibition, co-culture  
388 fails to produce any synergistic inhibitory effects. That is, if a pathogen is highly resistant to most

389 bacterial metabolites in the first instance, increases in the relative concentrations of those metabolites  
390 through co-culture-mediated competition are unlikely to elicit any significant increases in inhibitory  
391 capability. The most important consequence of this pattern is that for some pathogenic variants, multi-  
392 genus consortia are unlikely to be able to yield high inhibition in cases where individual isolates have  
393 failed to do so. Despite the observed variance in success of consortia across *B. dendrobatidis*  
394 isolates, our simulation trials revealed that multi-genus consortia offer the best broad-spectrum  
395 protection across multiple *B. dendrobatidis* isolates encountered in series. This finding is important;  
396 human-mediated spread of *B. dendrobatidis* through the amphibian trade (Fisher & Garner 2007)  
397 means we cannot assume that local populations will be exposed to only one pathogenic variant.  
398 Successful mitigation of the pathogen in the wild demands that we employ strategies with the highest  
399 broad-spectrum success over multiple pathogen genotypes. Combining bacteria that show high levels  
400 of inhibition across multiple *B. dendrobatidis* isolates may further increase the effectiveness of  
401 consortia (intermediate inhibitors were selected for this study to allow greater insight into community  
402 dynamics).

403

#### 404 *Conclusion*

405 This study adds to a growing body of evidence suggesting that diverse, multi-species consortia may  
406 represent powerful disease mitigation tools, offering superior probiotic protection against disease  
407 compared to single bacterial isolates. Our work has highlighted that different isolates of a pathogen  
408 can modify the strength of inhibition caused by the probiotic, meaning we cannot expect probiotic  
409 effectiveness to be uniform across the genetic landscape of the pathogen. Despite the relative merits  
410 of multi-genus consortia for mitigating single and multiple *B. dendrobatidis* variants, it remains to be  
411 determined how readily these consortia will be able to colonise the host skin *in vivo*. This is crucial for  
412 to being able to quantify how applicable inhibition measures derived *in vitro* are to real-world  
413 scenarios. Nevertheless, our data highlight the merits of a community-level approach to probiotic  
414 mitigation of wildlife disease, which may offer more broad-spectrum host protection in the face of  
415 large-scale heterogeneity in pathogen genotype.

416

417



418 **ACKNOWLEDGEMENTS**

419 This study was partly funded by a North-West University Postdoctoral Research Fellowship awarded  
420 to REA. XAH was funded by an Institute of Zoology Research Fellowship. The authors would like to  
421 thank Prof Richard Preziosi and Dr Trenton Garner for additional provision of consumables, and Prof  
422 Ché Weldon, Dr Trenton Garner and Prof Matthew Fisher for access to *Batrachochytrium*  
423 *dendrobatidis* isolates used in this study.

424

425

426 **REFERENCES**

427 Antwis, R.E., Preziosi, R.F., Harrison, X.A., Garner, T.W. (2015). Amphibian symbiotic bacteria do not  
428 show a universal ability to inhibit growth of the global panzootic lineage of *Batrachochytrium*  
429 *dendrobatidis*. *Applied and Environmental Microbiology*, 81, 3706-3711.

430

431 Bates, D., Maechler, M., Bolker, B., Walker, S. (2015). Fitting Linear Mixed-Effects Models Using  
432 lme4. *Journal of Statistical Software*, 67, 1-48. doi:10.18637/jss.v067.i01.

433

434 Becker, M.H., Walke, J.B., Murrill, L., Woodhams, D.C., Reinert, L.K., Rollins-Smith, L.A., et al. (2015).  
435 Phylogenetic distribution of symbiotic bacteria from Panamanian amphibians that inhibit growth of the  
436 lethal fungal pathogen *Batrachochytrium dendrobatidis*. *Molecular Ecology*, 24, 1628-1641.

437

438 Bell, S.C., Alford, R.A., Garland, S., Padilla, G., Thomas, A.D. (2013). Screening bacterial metabolites  
439 for inhibitory effects against *Batrachochytrium dendrobatidis* using a spectrophotometric  
440 assay. *Diseases of Aquatic Organisms*, 103, 77-85.

441

442 Bletz, M.C., Loudon, A.H., Becker, M.H., Bell, S.C., Woodhams, D.C., Minbiole, K.P. et al. (2013).  
443 Mitigating amphibian chytridiomycosis with bioaugmentation: characteristics of effective probiotics and  
444 strategies for their selection and use. *Ecology letters*, 16, 807-20.



445

446 Bletz, M.C., Goedbloed, D.J., Sanchez, E., Reinhardt, T., Tebbe, C.C., Bhuju, S., et al. (2016).

447 Amphibian gut microbiota shifts differentially in community structure but converges on habitat-specific

448 predicted functions. *Nature Communications*, 7.

449

450 Cohen, J. M., Venesky, M. D., Sauer, E. L., Civitello, D. J., McMahon, T. A., Roznik, E. A. et al.

451 (2017). The thermal mismatch hypothesis explains host susceptibility to an emerging infectious

452 disease. *Ecology Letters*, 20, 184–193. doi:10.1111/ele.12720

453

454 de Jong, M.D., Hien, T.T. (2006). Avian influenza A (H5N1). *Journal of Clinical Virology*, 35, 2-13.

455

456 Dillon, R.J., Vennard, C.T., Buckling, A., Charnley, A.K. (2005). Diversity of locust gut bacteria

457 protects against pathogen invasion. *Ecology Letters*, 8, 1291-8.

458

459 Doddington, B.J., Bosch, J., Oliver, J.A., Grassly, N.C., Garcia, G., Schmidt, B.R., et al. (2013),

460 Context-dependent amphibian host population response to an invading pathogen. *Ecology*, 94, 1795-

461 1804.

462

463 Eisenhauer, N., Scheu, S., Jousset, A. (2012). Bacterial diversity stabilizes community productivity.

464 *PloS one*, 7, e34517.

465

466 Eisenhauer, N., Schulz, W., Scheu, S., Jousset, A., Pfrender, M. (2013). Niche dimensionality links

467 biodiversity and invasibility of microbial communities. *Functional Ecology*, 27, 282-8.

468

469 Farrer, R.A., Weinert, L.A., Bielby, J., Garner, T.W., Balloux, F., Clare, F., et al. (2011) Multiple

470 emergences of genetically diverse amphibian-infecting chytrids include a globalized hypervirulent

471 recombinant lineage. Proceedings of the National Academy of Sciences of the United States of  
472 America, 108, 18732-6.

473

474 Farrer, R.A., Henk, D.A., Garner, T.W., Balloux, F., Woodhams, D.C., Fisher, M.C. (2013).  
475 Chromosomal copy number variation, selection and uneven rates of recombination reveal cryptic  
476 genome diversity linked to pathogenicity. PLoS Genetics, 9, p. e1003703.

477

478 Fisher, M.C., Garner, T.W.J. (2007) The relationship between the emergence of *Batrachochytrium*  
479 *dendrobatidis*, the international trade in amphibians and introduced amphibian species. Fungal Biology  
480 Reviews, 21, 2-9.

481

482 Fisher, M.C., Bosch, J., Yin, Z., Stead, D.A., Walker, J., Selway, L., et al. (2009) Proteomic and  
483 phenotypic profiling of the amphibian pathogen *Batrachochytrium dendrobatidis* shows that genotype  
484 is linked to virulence. Molecular ecology, 18, 415-29.

485

486 Fisher, M.C., Henk, D.A., Briggs, C.J., Brownstein, J.S., Madoff, L.C., McCraw, S.L., et al. (2012).  
487 Emerging fungal threats to animal, plant and ecosystem health. Nature Reviews, 484, 186-194.

488

489 Garbaye, J. (1994). Helper bacteria: a new dimension to the mycorrhizal symbiosis. New Phytologist,  
490 128, 197-210.

491

492 Garner, T.W., Schmidt, B.R., Martel, A., Pasmans, F., Muths, E., Cunningham, A.A., et al. (2016).  
493 Mitigating amphibian chytridiomycoses in nature. Phil. Trans. R. Soc. B, 371, 20160207.

494

495 Geweke, J. (1992) Evaluating the accuracy of sampling-based approaches to calculating posterior  
496 moments. In *Bayesian Statistics 4* (ed JM Bernardo, JO Berger, AP Dawid and AFM Smith). Clarendon  
497 Press, Oxford, UK.

498

499 Goka, K., Yokoyama, J., Une, Y., Kuroki, T., Suzuki, K., Nakahara, M., et al. (2009). Amphibian  
500 chytridiomycosis in Japan: distribution, haplotypes and possible route of entry into Japan. *Molecular*  
501 *Ecology*, 18, 4757-74.

502

503 Hadfield, J.D. (2010). MCMC Methods for Multi-Response Generalized Linear Mixed Models: The  
504 MCMCglmm R Package. *Journal of Statistical Software*, 33(2), 1-22. URL:  
505 <http://www.jstatsoft.org/v33/i02/>.

506

507 Hardoim, P.R., van Overbeek, L.S., Berg, G., Pirttilä, A.M., Compant, S., Campisano, A., et al. (2015).  
508 The hidden world within plants: ecological and evolutionary considerations for defining functioning of  
509 microbial endophytes. *Microbiology and Molecular Biology Reviews*, 79, 293-320.  
510 doi:10.1128/MMBR.00050-14.

511

512 Harris, R.N., Lauer, A., Simon, M.A., Banning, J.L., Alford, R.A. (2009). Addition of antifungal skin  
513 bacteria to salamanders ameliorates the effects of chytridiomycosis. *Diseases of Aquatic*  
514 *Organisms*, 83, 11-16.

515

516 Hoyt, J.R., Cheng, T.L., Langwig, K.E., Hee, M.M., Frick, W.F., Kilpatrick, A.M. (2015). Bacteria  
517 isolated from bats inhibit the growth of *Pseudogymnoascus destructans*, the causative agent of white-  
518 nose syndrome. *PLoS One*, 10, e0121329.

519

520 Jani, A.J., Briggs, C.J. (2014). The pathogen *Batrachochytrium dendrobatidis* disturbs the frog skin  
521 microbiome during a natural epidemic and experimental infection. *Proceedings of the National*  
522 *Academy of Sciences of the United States of America*, 111, E5049-58.

523

524 Jenkinson, T.S., Betancourt Román, C.M., Lambertini, C., Valencia-Aguilar, A., Rodriguez, D., Nunes-  
525 de-Almeida, C.H., et al. (2016) Amphibian-killing chytrid in Brazil comprises both locally endemic and  
526 globally expanding populations. *Molecular Ecology*, 25, 2978–2996.

527

528 Jousset, A., Schmid, B., Scheu, S., Eisenhauer, N. (2011). Genotypic richness and dissimilarity  
529 opposingly affect ecosystem functioning. *Ecology Letters*, 14, 537-45.

530

531 Kueneman, J.G., Woodhams, D.C., Harris, R., Archer, H.M., Knight, R., McKenzie, V.J., (2016)  
532 Probiotic treatment restores protection against lethal fungal infection lost during amphibian  
533 captivity. *Proc. R. Soc. B*, 283, 1839.

534

535 Loudon, A. H., Holland, J. A., Umile, T. P., Burzynski, E. A., Minbiole, K. P. C., & Harris, R. N. (2014).  
536 Interactions between amphibians' symbiotic bacteria cause the production of emergent anti-fungal  
537 metabolites. *Frontiers in Microbiology*, 5. doi:10.3389/fmicb.2014.00441

538

539 Martel, A., Spitzen-van der Sluijs, A., Blooi, M., Bert, W., Ducatelle, R., Fisher, M.C., et al. (2013).  
540 *Batrachochytrium salamandrivorans* sp. nov. causes lethal chytridiomycosis in  
541 amphibians. *Proceedings of the National Academy of Sciences*, 110, 15325-15329.

542

543 Martel, A., Blooi, M., Adriaensen, C., Van Rooij, P., Beukema, W., Fisher, M.C., et al. (2014). Recent  
544 introduction of a chytrid fungus endangers Western Palearctic salamanders. *Science*, 346, 630-631.

545

546 Matos, A., Kerkhof, L., Garland, J.L. (2005). Effects of microbial community diversity on the survival of  
547 *Pseudomonas aeruginosa* in the wheat rhizosphere. *Microbial Ecology*, 49, 257-64.

548

549 McCallum, H. (2012) Disease and the dynamics of extinction. *Philos Trans R Soc Lond B Biol Sci* 367:  
550 2828–2839. doi: 10.1098/rstb.2012.0224. pmid:22966138

551

552 Morgan, J.A., Vredenburg, V.T., Rachowicz, L.J., Knapp, R.A., Stice, M.J., Tunstall, T., et al. (2007).

553 Population genetics of the frog-killing fungus *Batrachochytrium dendrobatidis*. Proceedings of the

554 National Academy of Sciences of the United States of America, 104, 13845-50.

555

556 Muletz, C.R., Myers, J.M., Domangue, R.J., Herrick, J.B., Harris, R.N. (2012). Soil bioaugmentation

557 with amphibian cutaneous bacteria protects amphibian hosts from infection by *Batrachochytrium*

558 *dendrobatidis*. Biological Conservation, 152, 119-126.

559

560 Olson, D.H., Aanensen, D.M., Ronnenberg, K.L., Powell, C.I., Walker, S.F., Bielby, J., et al. (2013).

561 Mapping the global emergence of *Batrachochytrium dendrobatidis*, the amphibian chytrid fungus. PloS

562 one, 8, e56802.

563

564 Piovia-Scott, J., Rejmanek, D., Woodhams, D. C., Worth, S. J., Kenny, H., McKenzie, V., et al. (2017).

565 Greater Species Richness of Bacterial Skin Symbionts Better Suppresses the Amphibian Fungal

566 Pathogen *Batrachochytrium Dendrobatidis*. Microbiology Ecology, DOI 10.1007/s00248-016-0916-4.

567

568 R Core Team. (2016). R: A language and environment for statistical computing. R Foundation for

569 Statistical Computing, Vienna, Austria. URL <https://www.R-project.org/>.

570

571 Rebollar, E.A., Antwis, R.E., Becker, M.H., Belden, L.K., Bletz, M.C., Brucker, R.M., et al. (2016).

572 Using "Omics" and Integrated Multi-Omics Approaches to Guide Probiotic Selection to Mitigate

573 Chytridiomycosis and Other Emerging Infectious Diseases. Frontiers in Microbiology, 7, 68.

574

575 Rodriguez, D., Becker, C. G., Pupin, N.C., Haddad, C.F.B., Zamudio, K. R. (2014). Long-term

576 endemism of two highly divergent lineages of the amphibian-killing fungus in the Atlantic Forest of

577 Brazil. Molecular Ecology, 23, 774-87.

578

579 Romanowski, K., Zaborin, A., Fernandez, H., Poroyko, V., Valuckaite, V., Gerdes, S., et al. (2011).

580 Prevention of siderophore- mediated gut-derived sepsis due to *P. aeruginosa* can be achieved without

581 iron provision by maintaining local phosphate abundance: role of pH. *BMC Microbiology*, 11: 212

582

583 Rosenblum, E.B., James, T.Y., Zamudio, K.R., Poorten, T.J., Ilut, D., Rodriguez, D., et al. (2013).

584 Complex history of the amphibian-killing chytrid fungus revealed with genome resequencing data.

585 *Proceedings of the National Academy of Sciences of the United States of America*, 110, 9385-90.

586

587 Scheuring, I., Yu, D.W. (2012). How to assemble a beneficial microbiome in three easy steps. *Ecology*

588 *Letters*, 15, 1300-7.

589

590 Schock, D.M., Bollinger, T.K., Collins, J.P. (2009). Mortality rates differ among amphibian populations

591 exposed to three strains of a lethal ranavirus. *EcoHealth*, 6, 438-48.

592

593 Schloegel, L.M., Toledo, L.F., Longcore, J.E., Greenspan, S.E., Vieira, C.A., Lee, M., et al. (2012)

594 Novel, panzootic and hybrid genotypes of amphibian chytridiomycosis associated with the bullfrog

595 trade. *Molecular Ecology*, 21, 5162-77.

596

597 Skerratt, L.F., Berger, L., Speare, R., Cashins, S., McDonald, K.R., et al. (2007) Spread of

598 chytridiomycosis has caused the rapid global decline and extinction of frogs. *Ecohealth* 4: 125–134.

599

600 Sleeman, J.M. (2013). Has the time come for big science in wildlife health? *EcoHealth*, 10, 335-338.

601

602 Tompkins, D.M., Carver, S., Jones, M.E., Krkošek, M., Skerratt, L.F. (2015). Emerging infectious

603 diseases of wildlife: a critical perspective. *Trends in Parasitology*, 31, 149-159.

604

605 van Elsas, J.D., Chiurazzi, M., Mallon, C.A., Elhottova, D., Kristufek, V., Salles, J.F. (2012). Microbial  
606 diversity determines the invasion of soil by a bacterial pathogen. *Proceedings of the National*  
607 *Academy of Sciences of the United States of America*, 109, 1159-64.

608

609 Walke, J.B., Becker, M.H., Loftus, S.C., House, L.L., Teotonio, T.L., Minbiole, K.P. et al. (2015).  
610 Community Structure and Function of Amphibian Skin Microbes: An Experiment with Bullfrogs  
611 Exposed to a Chytrid Fungus. *PloS one*, 10, e0139848.

612

613 Woodhams, D.C., Brandt, H., Baumgartner, S., Kielgast, J., Küpfer, E., Tobler, U., et al. (2014).  
614 Interacting symbionts and immunity in the amphibian skin mucosome predict disease risk and  
615 probiotic effectiveness. *PLoS One*, 9(4), p.e96375.

616

617 Yasumiba, K., Bell, S., Alford, R. (2016). Cell density effects of frog skin bacteria on their capacity to  
618 inhibit growth of the chytrid fungus, *Batrachochytrium dendrobatidis*. *Microbial Ecology*, 71, 124-30.  
619 doi:10.1007/s00248-015-0701-9

620

621

622

623

#### 624 **DATA ACCESSIBILITY**

625 Genbank accession numbers of all bacteria are provided in Supplementary Materials. Data files and R  
626 Markdown will be made available on Dryad.

627

#### 628 **AUTHOR CONTRIBUTIONS**

629 RA and XH conceived the study, RA collected the data, XH analysed the data, RA and XH wrote the  
630 paper. Both authors contributed equally to this paper.

631

632 **TABLE LEGENDS**

633 **Table 1**

634 *Batrachochytrium dendrobatidis* isolates used in the study.

635

636 **Table 2**

637 Composition of multi-genus consortia used in the study. Single-genus consortia comprised all three  
638 bacterial isolates (A, B and C) for a given genus (*Acinetobacter*, *Chryseobacterium*, *Serratia*,  
639 *Stentrophomonas*).

640

641 **Table 3**

642 Mean Proportion of 10 *Bd*GPL isolates for which at least weak inhibitory capability was observed,  
643 averaged over all bacterial isolates in a genus. 95% CI: 95% confidence intervals from an  
644 overdispersion-corrected Binomial GLM.

645

646

647 **FIGURE LEGENDS**

648 **Figure 1. Inhibition scores of 58 bacterial strains from 10 genera when tested against 10**

649 ***Bd*GPL isolates.** Estimates are derived from a Bayesian mixed effects model with bacterial isolate  
650 nested within genus, and *Bd*GPL isolate fitted as random effects. Points are conditional modes of the  
651 individual isolate random effects, marginalised with respect to *Bd*GPL isolate. Error bars are 95%  
652 credible intervals.

653

654 **Figure 2. Inhibition scores of 10 *Bd*GPL isolates.** Estimates are derived from a Bayesian mixed  
655 effects model with bacterial isolate nested within genus, and *Bd*GPL isolate fitted as random effects.  
656 Points are conditional modes of the individual *Bd*GPL isolate random effects, marginalised with  
657 respect to bacterial isolate. Error bars are 95% credible intervals.



658

659 **Figure 3. Inhibition scores for Single-Genus and Multi-Genus Consortia across three *B.***

660 ***dendrobatidis* isolates** (*Bd*GPL MODS28.1, *Bd*GPL SFBC019 and *Bd*CAPE TF5a1). Points have

661 been jittered for display purposes.

662

663 **Figure 4. Simulation results examining the relative efficacy of different probiotic strategies.** (A)

664 the probability of Multi-Genus Consortia (MGC) yielding higher inhibition compared to Single-Genus

665 Consortia (SGC) or a Single Bacterial Isolate (Single); (B) the probability of MGC, SGC or Single

666 bacteria yielding inhibition > 50% when applied to each of three *B. dendrobatidis* isolates; (C) The

667 probability of an individual consortium type yielding >50% inhibition when applied to two randomly

668 chosen *B. dendrobatidis* isolates in series.

669

670

Genus: Bacterial Isolate

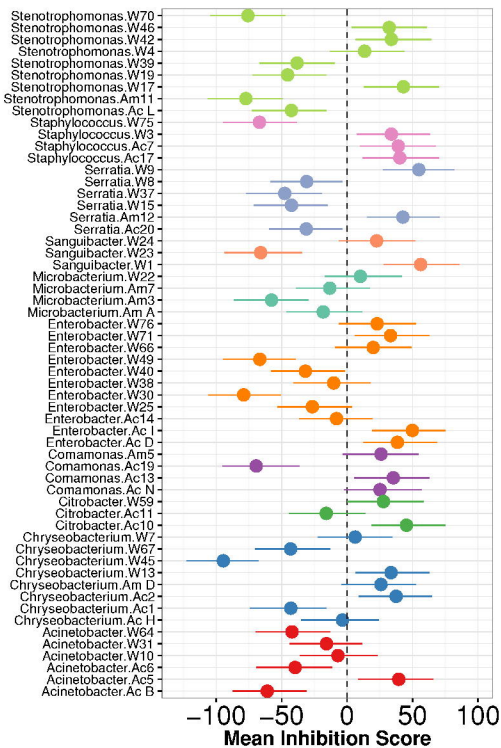

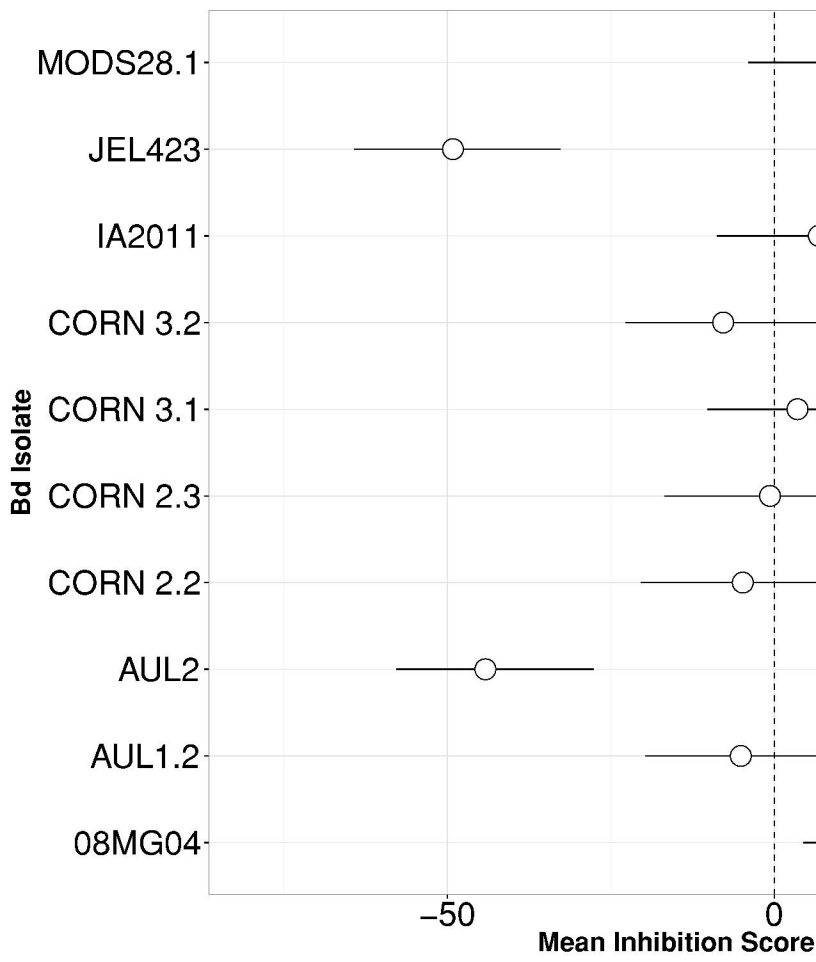

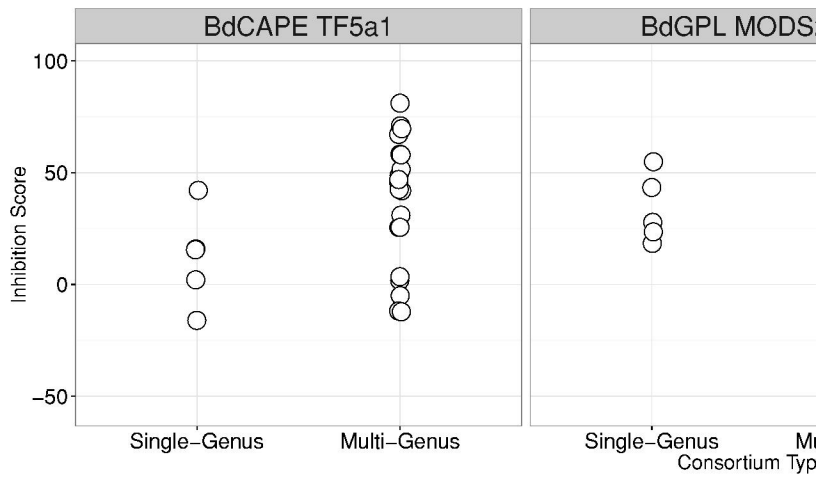

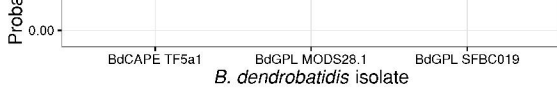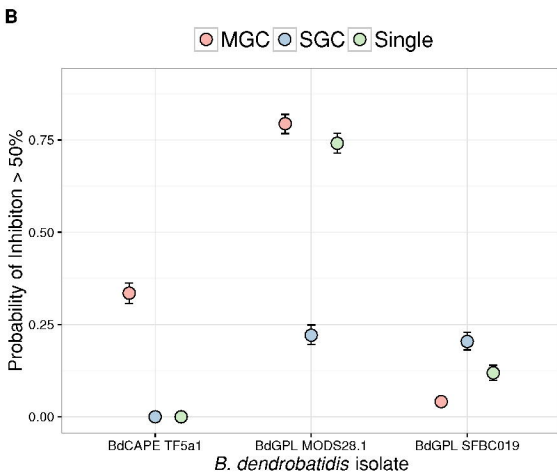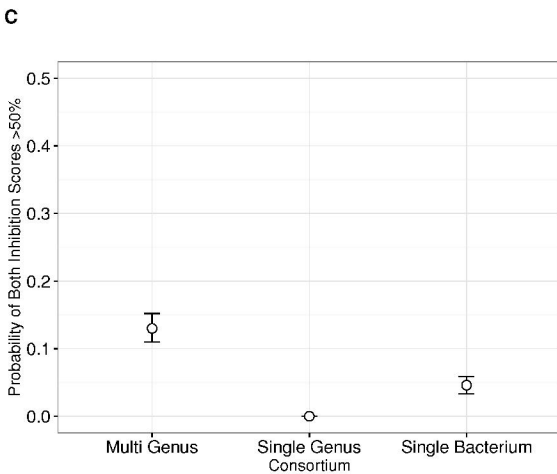

Source: http://www.biorxiv.org/content/10.1101/123968v2.full.pdf
